# Supplementary material
Source: publisher site journal article supplement (https://www.dovepress.com/article/251846)
Supplement: Supplementary file 1 [file get_supplementary_file.php]

**Supplemental Table**. Associations between tertiles of triglyceride-associated indices and the risk of LGA infant

|  | LGA (n) | Adjusted odds ratio (95% confidence interval) | |
| --- | --- | --- | --- |
| Tertiles of indices | LGA infant‡ | *P* value |
| TG/HDL-c |  | | |
| Tertile 1 | 4 | Reference |  |
| Tertile 2 | 10 | 2.299(0.667-7.919) | 0.137 |
| Tertile 3 | 17 | 3.341(0.984-11.345) | 0.053 |
| TyG index |  | | |
| Tertile 1 | 6 | Reference |  |
| Tertile 2 | 7 | 0.966(0.296-3.153) | 0.954 |
| Tertile 3 | 18 | 2.477(0.810-7.575) | 0.112 |

‡adjusted for age, education, physical activity, BMI (at enrolment), parity, family history of diabetes, history of PCOS, CRP, labor method, fetal sex, gestation age, and GDM (yes/no)
